# Supplementary material
Source: PubMed Central journal article supplement (PMC5595737)
Supplement: 13280_2016_858_MOESM1_ESM.pdf [file 13280_2016_858_MOESM1_ESM.pdf]

**Ambio**

Electronic Supplementary Material

*This supplementary material has not been peer reviewed*

**Title: Commensal in conflict: livestock depredation patterns by free-ranging domestic dogs in the Upper Spiti Landscape, Himachal Pradesh, India**

Table S1 Naïve estimates of dog populations in 13 villages. Mark-recapture analysis could not be carried out for 11 villages.

| Village   | No. of dogs | Sampling method         |
|-----------|-------------|-------------------------|
| Lossar    | 6           | Three day sampling      |
| Chichong  | 1           | Three day sampling      |
| Pangmo    | 2           | Three day sampling      |
| Hansa     | 4           | Three day sampling      |
| Hikkim    | 2           | Three day sampling      |
| Langza    | 3           | Three day sampling      |
| Demul     | 2           | Three day sampling      |
| Lara      | 2           | Three day sampling      |
| Rama      | 1           | Three day sampling      |
| Lalung    | 2           | Three day sampling      |
| Lingti    | 3           | Three day sampling      |
| Gete      | 1           | Time constrained search |
| Tashigang | 0           | Time constrained search |

Table S2

The closure assumption was violated for two villages (Kaza and Shego), indicating that dogs may have moved out before the successive resampling occasions, whereas for two villages (Hull and Kyoto) sample sizes were inadequate to run closure analysis. Although CAPTURE identified the null model ( $M_0$ ) as the most parsimonious measure of population estimates for seven villages, we preferred to use heterogeneity models ( $M_h$ ), which had the second highest model selection criterion. Heterogeneity models assume that capture probabilities vary across individual animals, which we believe to be more appropriate for free ranging dogs. In the remaining five villages, heterogeneity ( $M_h$ ), behavioral ( $M_b$ ) or combinations of both ( $M_{hb}$ ) were selected as best models of population estimate.

Estimated abundance and capture probabilities of free-ranging dogs from mark-recapture analysis of 12 villages in the Upper Spiti Landscape

| Village | Model | $\hat{p}$ | $\hat{N}$ | CI      | CV   | (M+1) | $p$ -value <sup>a</sup> |
|---------|-------|-----------|-----------|---------|------|-------|-------------------------|
| Chicham | Mh    | 0.58      | 8         | 8-14    | 18.9 | 7     | 0.80                    |
| Hull    | Mb    | 0.91      | 10        | 10-10   | 0.9  | 10    | -                       |
| Kaza    | Mh    | 0.40      | 317       | 293-349 | 4.5  | 224   | 0.01*                   |
| Kee     | Mh    | 0.45      | 11        | 10-18   | 16.8 | 9     | 0.16                    |
| Khurik  | Mh    | 0.67      | 26        | 24-37   | 10.5 | 23    | 0.74                    |
| Kiamo   | Mh    | 0.62      | 7         | 7-12    | 15.1 | 6     | 0.29                    |
| Kibber  | Mh    | 0.74      | 18        | 18-24   | 8.4  | 17    | 0.16                    |
| Kyoto   | Mh    | 0.92      | 4         | 4-4     | 0.75 | 4     | -                       |
| Lidang  | Mbh   | 0.54      | 15        | 15-28   | 15.1 | 14    | 0.65                    |
| Rangrik | Mh    | 0.5       | 104       | 94-123  | 7.2  | 81    | 0.16                    |
| Shego   | Mb    | 0.91      | 10        | 10-10   | 0.9  | 10    | 0.004*                  |
| Sumling | Mh    | 0.7       | 11        | 11-17   | 13.7 | 10    | 0.79                    |

$\hat{p}$  = Capture probability,  $\hat{N}$  = Population estimate, CI = Confidence Intervals for the population estimate, CV: Coefficient of Variation (%), (M+1) = Number of unique captures

<sup>a</sup> =  $p$  values for Close Test

\* $p < 0.05$
